# Supplementary material
Source: PubMed Central journal article supplement (PMC2730656)

**A**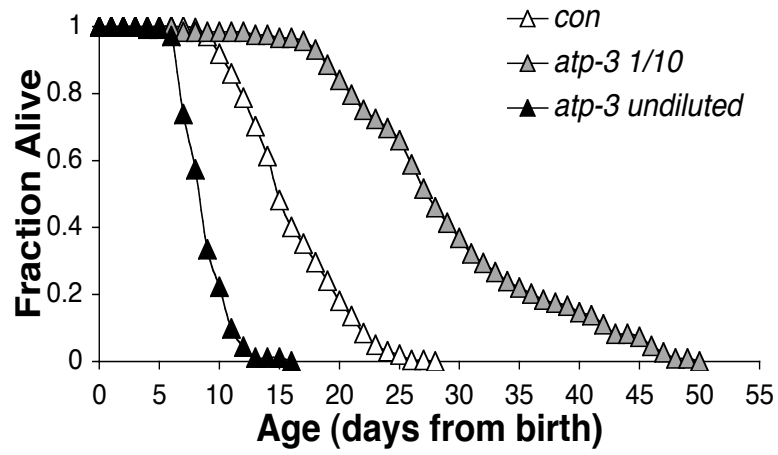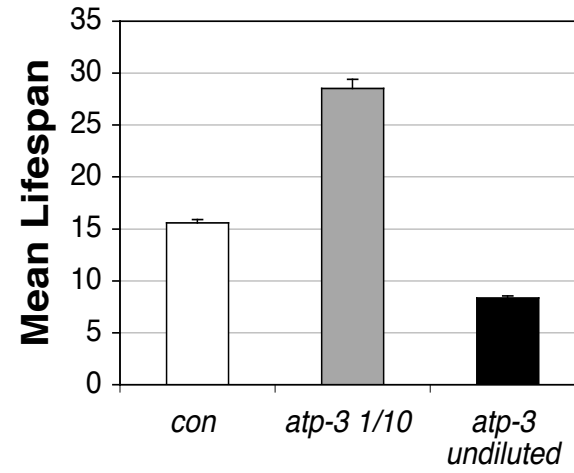**B**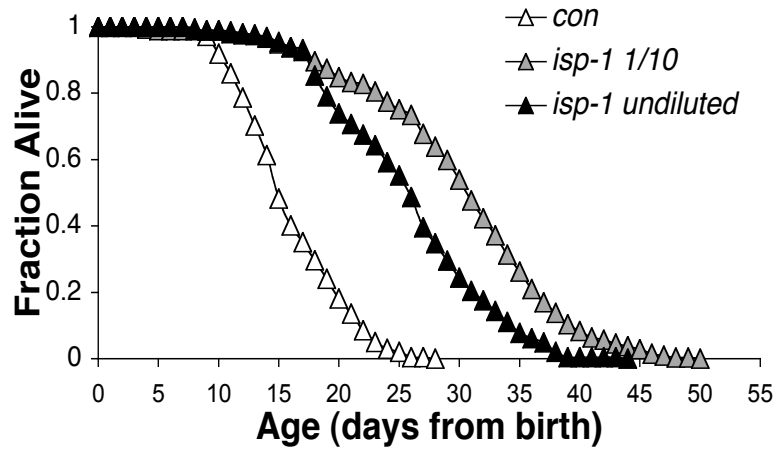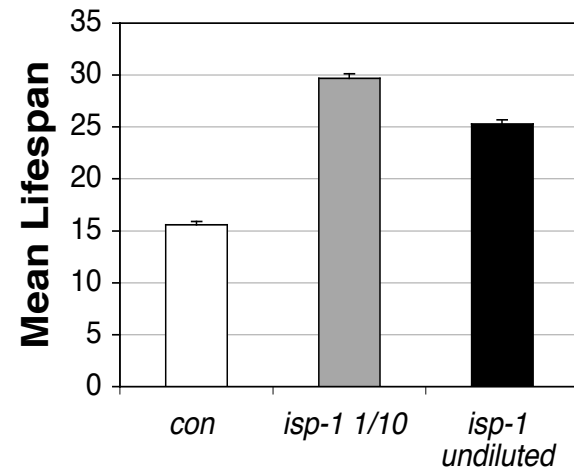

Supplement: NIHMS134511-supplement-Supp_Figure_3.pdf [file NIHMS134511-supplement-Supp_Figure_3.pdf]

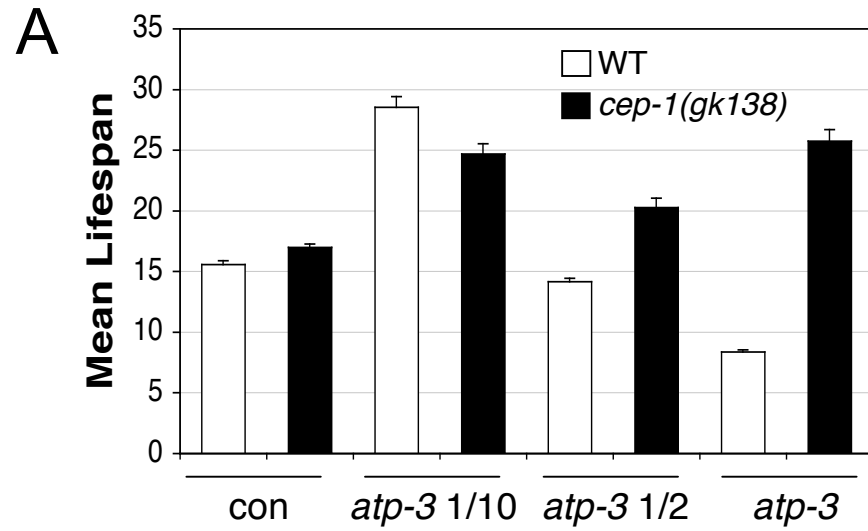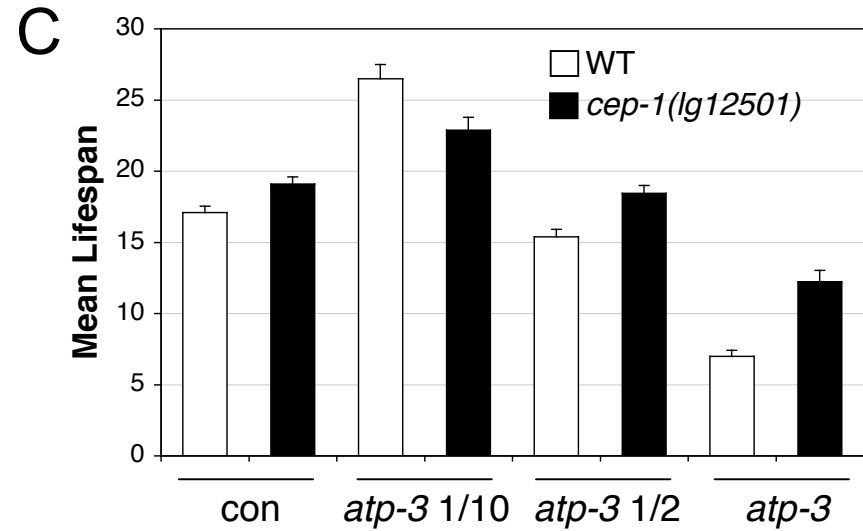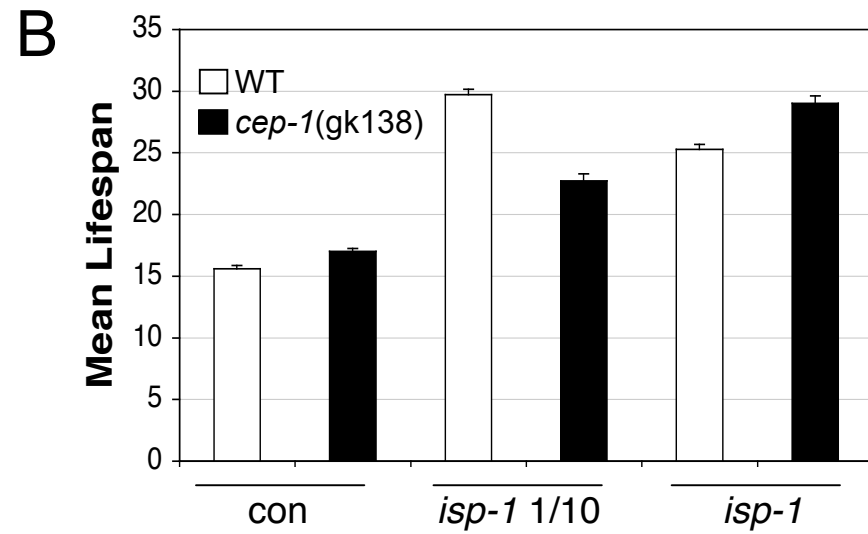

Supplement: NIHMS134511-supplement-Supp_Figure_4.pdf [file NIHMS134511-supplement-Supp_Figure_4.pdf]
